# Supplementary material for: The Imperative Use of Bacillus Consortium and Quercetin Contributes to Suppress Fusarium Wilt Disease by Direct Antagonism and Induced Resistance
Source: Preprints.org preprint supplement (doi:10.20944/preprints202309.2002.v1), 2023-09-28
Supplement: Supplementary file 1 [file supplementary]

Table S1. Physiological parameters of the receptor.

| <b>Parameter</b>    | <b>Value</b> |
|---------------------|--------------|
| Estimated half-life | 30 hours     |
| Theoretical pI      | 5.78         |
| Instability index   | 33.35        |
| Aliphatic index     | 87.62        |
| GRAVY               | -0.050       |
